# Supplementary material for: Identification and enhancing production of a novel macrolide compound in engineeredStreptomyces peucetius
Source: Royal Society of Chemistry journal article supplement (doi:10.1039/d0ra06099b), 2021-01-01
Supplement: d0ra06099b1.pdf [file d0ra06099b1.pdf]

## Supporting Information

### **Identification and enhancing production of a novel macrolide compound in engineered *Streptomyces peucetius***

Van Thuy Thi Pham<sup>a</sup>, Hue Thi Nguyen<sup>a</sup>, Chung Thanh Nguyen<sup>a</sup>, Ye Seul Choi<sup>a</sup>, Dipesh Dhakal<sup>a</sup>, Tae-Su Kim<sup>a</sup>, Hye Jin Jung<sup>a,b</sup>, Tokutaro Yamaguchi<sup>a</sup>, Jae Kyung Sohng<sup>a,b,†</sup>

<sup>a</sup>Department of Life Science and Biochemical Engineering, SunMoon University, 70 Sunmoon-ro 221, Tangjeong-myeon, Asan-si, Chungnam 31460, Republic of Korea.

<sup>b</sup>Department of Pharmaceutical Engineering and Biotechnology, SunMoon University, 70 Sunmoon-ro 221, Tangjeong-myeon, Asan-si, Chungnam 31460, Republic of Korea.

**†Corresponding author:**

Prof. Jae Kyung Sohng

Tel: +82(41)530-2246

Email: sohng@sunmoon.ac.kr

Fax: +82(41)530-8229

**List of figures**

Fig. S1 (a) The FT-IR spectrum of peucemycin ..... 3

Fig. S1 (b) Fragment analysis of peucemycin ..... 4

Fig. S2 (a)  $^1\text{H}$  NMR (700 MHz, DMSO-*d*6) spectrum of peucemycin ..... 5

Fig. S2 (b)  $^{13}\text{C}$  NMR (176 MHz, DMSO-*d*6) spectrum of peucemycin..... 6

Fig. S2 (c)  $^1\text{H}$ - $^1\text{H}$  COSY (700 MHz, DMSO-*d*6) spectrum of peucemycin ..... 7

Fig. S2 (d)  $^1\text{H}$ - $^1\text{H}$  ROESY (700 MHz, DMSO-*d*6) spectrum of peucemycin..... 8

Fig. S2 (e) HSQC (700 MHz, DMSO-*d*6) spectrum of peucemycin ..... 9

Fig. S2 (f) HMBC (700 MHz, DMSO-*d*6) spectrum of peucemycin..... 10

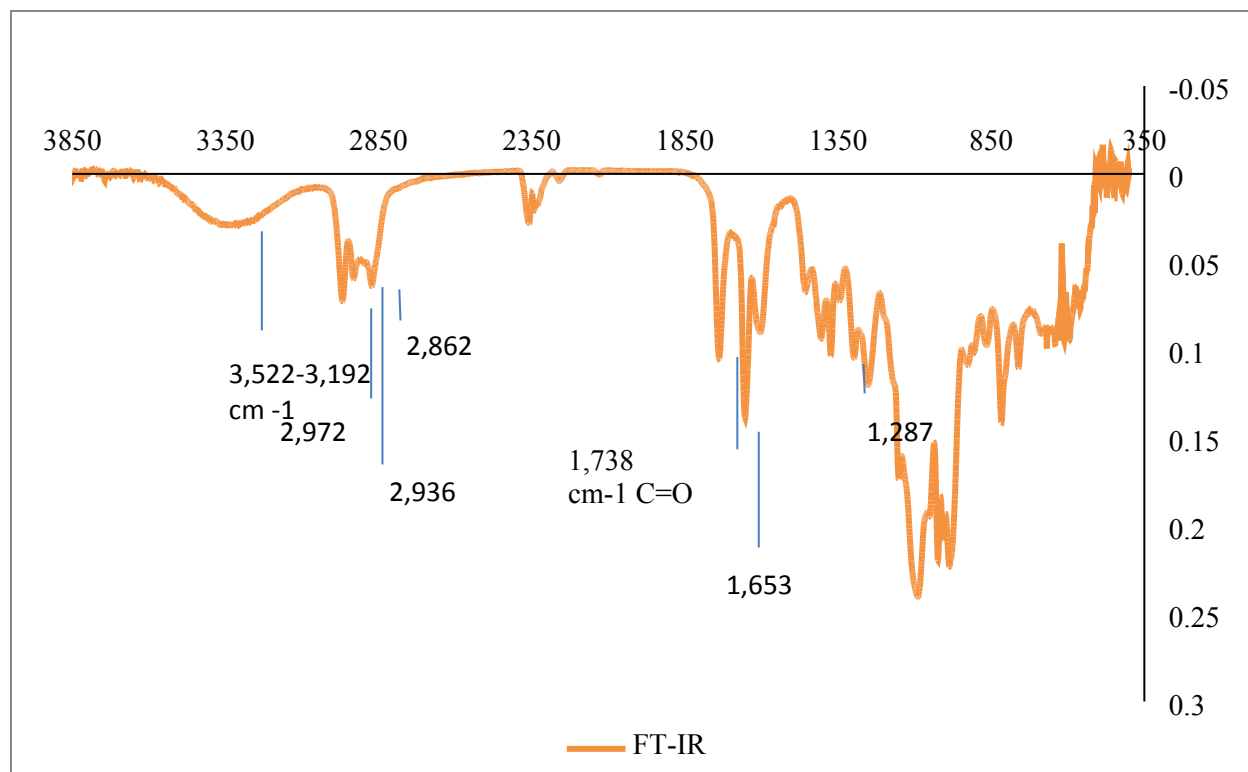

**Fig. S1 (a)** The FT-IR spectrum of peucemycin

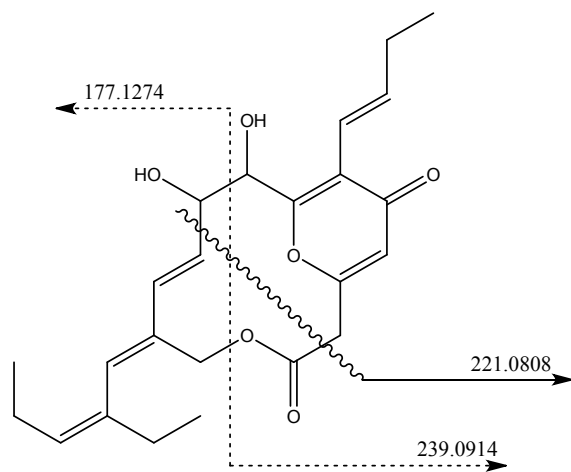

Chemical Formula:  $C_{12}H_{17}O^+$   
Exact Mass: 177.1274

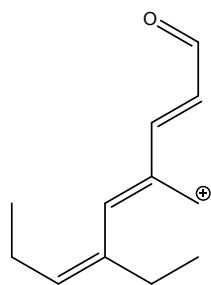

A

Chemical Formula:  $C_{12}H_{13}O_4^+$   
Exact Mass: 221.0808

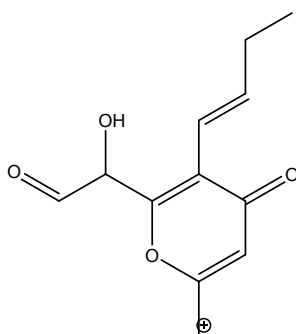

B

Chemical Formula:  $C_{12}H_{15}O_5^+$   
Exact Mass: 239.0914

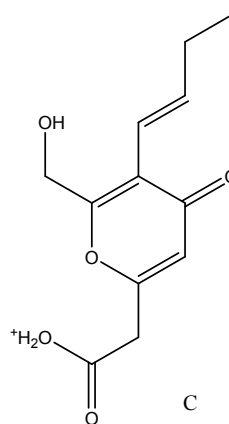

C

**Fig. S1 (b)** Fragment analysis of peucemycin

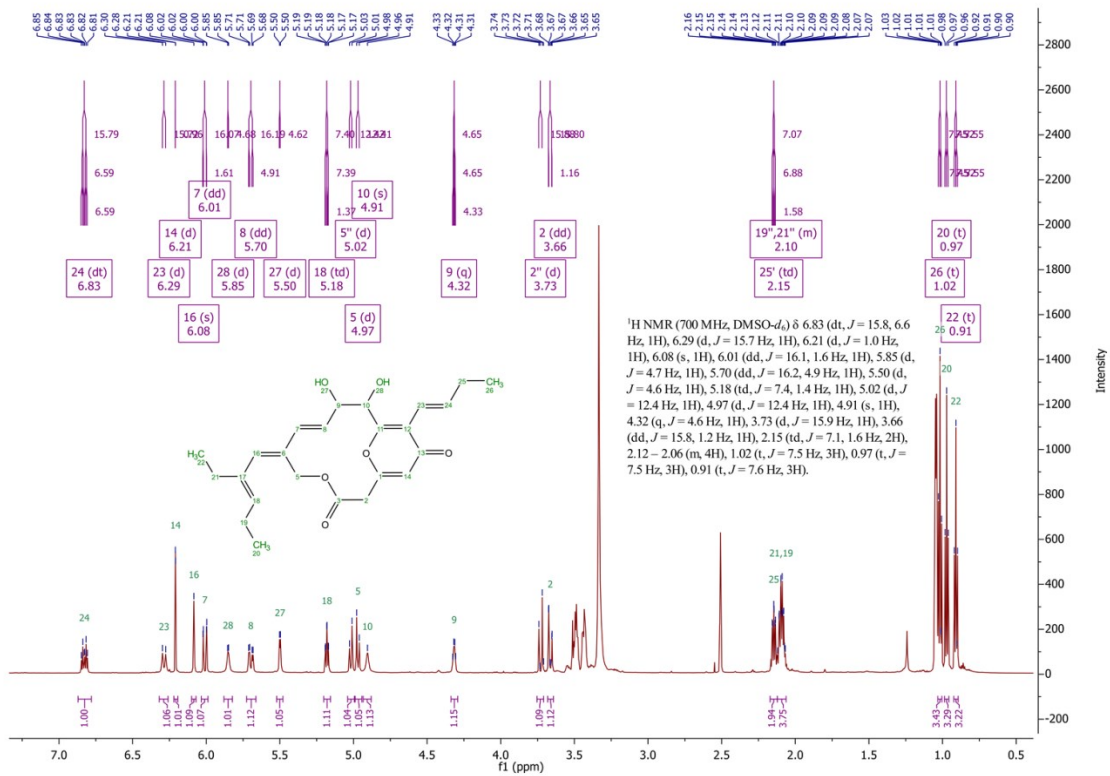

**Fig. S2 (a)** <sup>1</sup>H NMR (700 MHz, DMSO-*d*<sub>6</sub>) spectrum of peucemycin

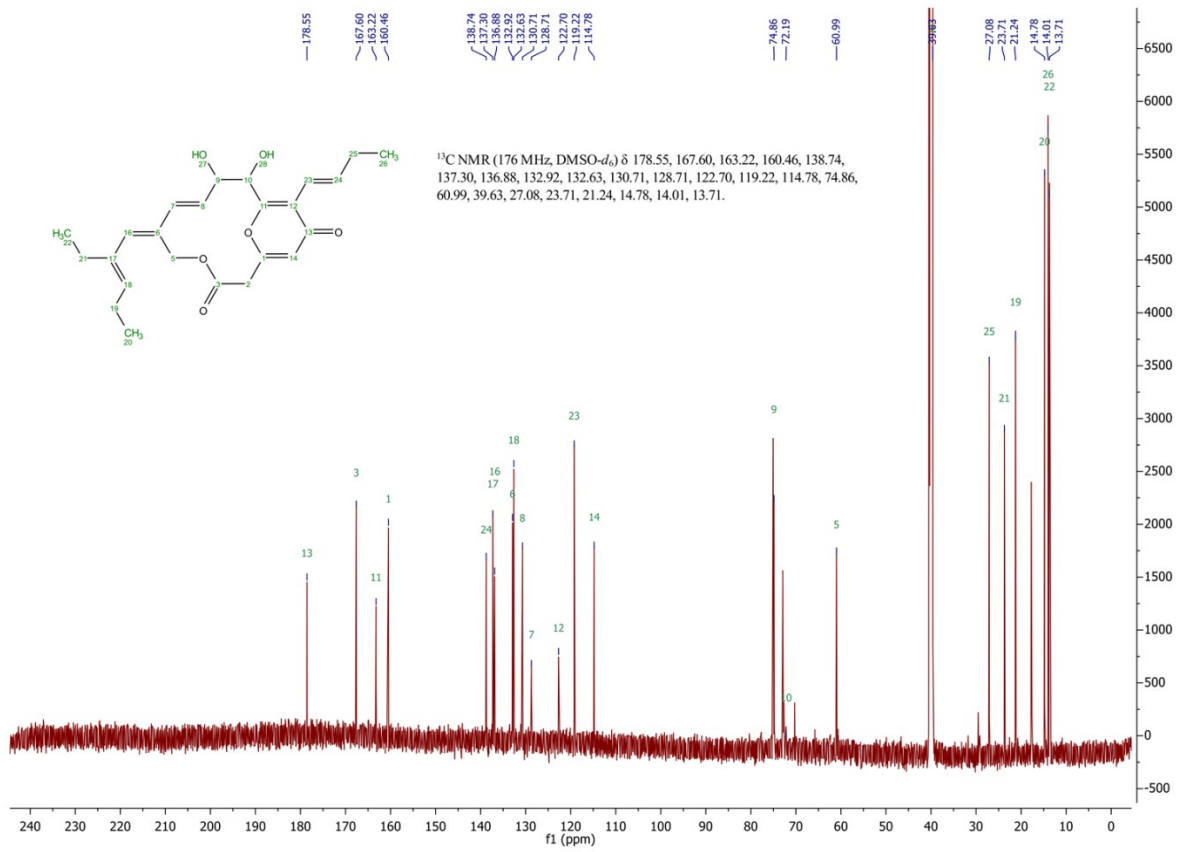

**Fig. S2 (b)** <sup>13</sup>C NMR (176 MHz, DMSO-*d*<sub>6</sub>) spectrum of peucemycin

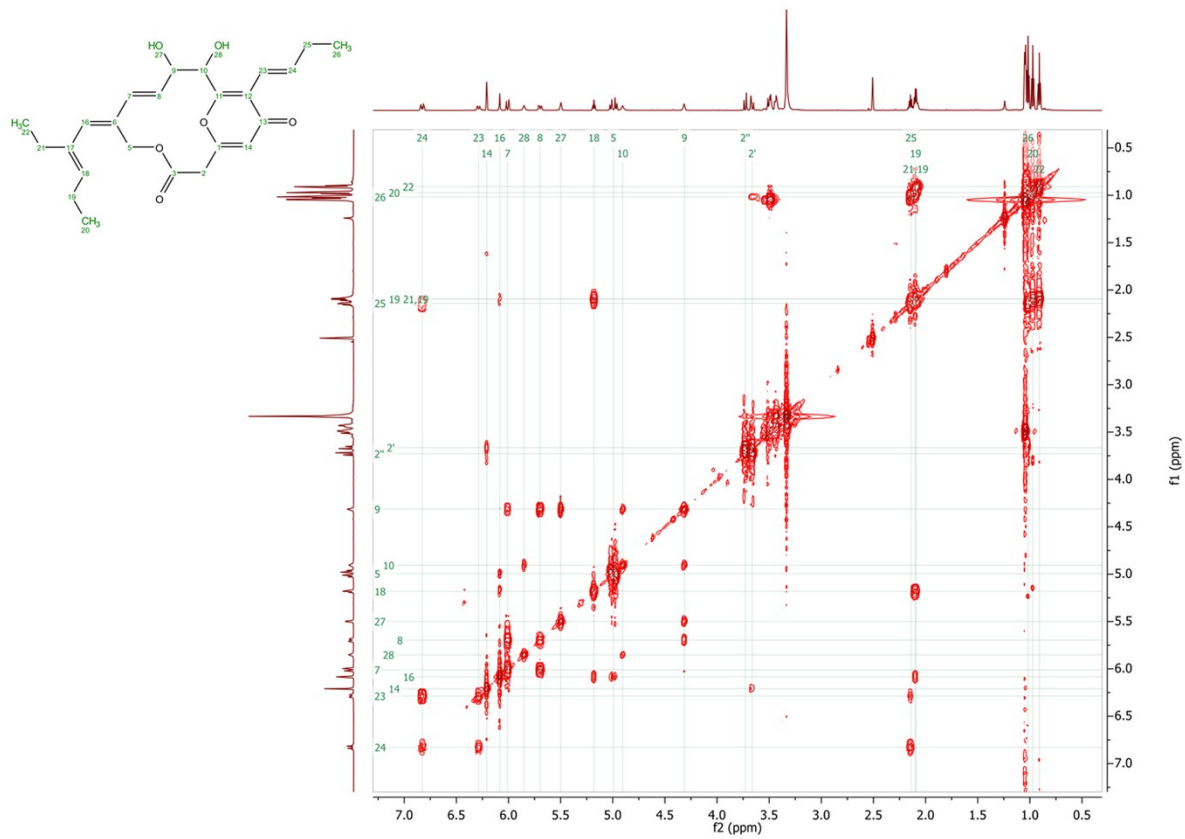

**Fig. S2 (c)**  $^1\text{H}$ - $^1\text{H}$  COSY (700 MHz,  $\text{DMSO-}d_6$ ) spectrum of peucemycin







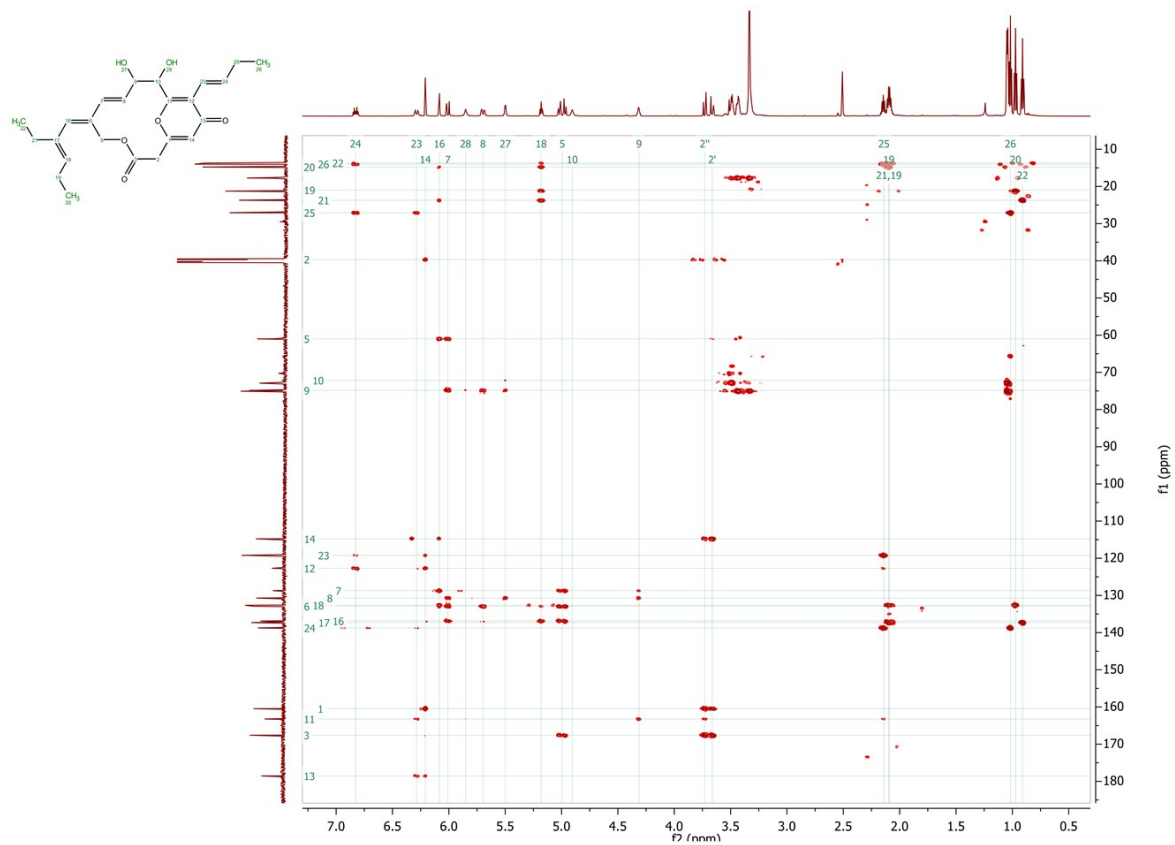

Fig. S2 (f) HMBC (700 MHz, DMSO-*d*<sub>6</sub>) spectrum of peucemycin
